# Supplementary material for: Phylogenomics and classification of Notropis and related shiners (Cypriniformes: Leuciscidae) and the utility of exon capture on lower taxonomic groups
Source: PeerJ. 2022 Oct 10;10:e14072. doi: 10.7717/peerj.14072 (PMC9558623; doi:10.7717/peerj.14072)
Supplement: Supplemental Information 1 — Taxonomy follows Gidmark & Simons (2014). AUFT = Auburn University Fish Tissue Collection; UAIC = University of Alabama Ichthyological Collection; SLUM = St. Louis University Museum; SELU = Southeastern Louisiana University. Type species for each genus is indicated with an asterisk. Code number is from the alignment file. Basic localities provided with latitude and longitude when available. [file peerj-10-14072-s001.xlsx]

## Sheet: ALL
Species	Tissue Voucher	Code in Alignment File	Locality
Outgroup
Notemigonus crysoleucas	AUFT 6632	08NOTEMIGONUScrysoleucas202551	Little Uchee Creek, at Meadows Mill, CR 175, 7.77 km S of Salem, Lee Co., AL. 32.52103°, -85.25408°
Chrosomus eos	AUFT 6624	26CHROSOMUSeos202556	East Branch Warroad River, at Norris-Roosevelt Forest Rd, Beltrami Island State Forest, 6.63 km S of Roosevelt, Roseau Co., MN, 48.75188°, -95.13424°
Phoxinus phoxinus	SLUM B.91.T187	13PHOXphoxinus202552	Miy, Thailand, purchased
Semotilus atromaculatus	AUFT 5949	22SEMOTILUSatromaculatus202554	Tributary to Wesobulga Creek, downstream of Spivey Road, 1.5 miles S of Mellow Valley, Clay Co., AL, 33.1651°, -85.74304°
Erimystax insignis	AUFT 6631	04ERIMYSTAXinsignis202550	Paint Rock River, along Hwy 65, 13.69 km NE of Gurley, between Hollytree and Trenton, Jackson Co., AL, 34.77522°, -86.2506°
Ingroup
Alburnops Girard 1856 (20 spp.)
Alburnops baileyi	SELU 87	63NOTROPbaileyi202479	Spencer Creek on CORD 231, east of I-59, Sumter Co., AL, 32.94653°, -87.80417°
Alburnops blennius*	SELU 451	61ALBURNblennius202477	Wisconsin R at Newton Island, Crawford Co., WI, 43.07499°, -90.85908°
Alburnops chalybaeus	SLUM 2046	57ALBURNchalybaeus202475	Lumber River at Lumber River State Park off Princess Anne Road (SR 2246), 10.0 air miles SE Fairmont, Columus/Robeson Co., NC, 34.39°, -79.00120°
Alburnops chiliticus	AUFT 1726	59ALBURNchiliticus202476	Yadkin river, upstream of Richland Road, 7.88 km SE of Blowing Rock, Caldwell Co., AL, 36.08708°, -81.59859°
Alburnops chlorocephalus	SLUM 2054	69ALBURNchlorocephalus202482	Lambert Fork at SR 1317 [Lindsay Bebber Road], Alexander Co., NC, 35.95°, -81.25119°
Alburnops chrosomus	SLUM 2056	71ALBURNchrosomus202483	Sina (or Sawmill) Branch (lower 70 m) and Minnewauga Creek at their confluence at Ladd Springs/Sheeds Creek roads intersection, Polk Co., TN, 35.01°, -84.68910°
Alburnops lutipinnis	SELU 492	65ALBURNlutipinnis202480	Brushy Creek at Zebrina Rd., 4 mi. SE of Wrens, Jefferson Co., GA, 33.18277°, -82.35867°
Alburnops petersoni	SELU 945	67ALBURNpetersoni202481	Lynches River near Timmonsville, Florence Co., SC
Alburnops potteri	SLUM 2203	74ALBURNpotteri202485	Red River at US 82 (east bank), just E of Garland, Lafayette/Mille Co., AR, 33.36°, -93.70160°
Alburnops rubricroceus	SLUM 2243	78ALBURNrubricroceus202487	Swannanoa River off SR 2754 [Azalea Road E], [ca. 4.3 air miles ESE center Asheville], Buncombe Co., NC, 35.58°, -82.47472°
Alburnops texanus	AUFT 0579	73ALBURNtexanus202484	Yellow River, at CR 32, 9 miles SW of Opp, Covington Co., AL, 31.19076°, -8636068°
Alburnops xaenocephalus	SLUM 2310	55ALBURNxaenocephalus202533	Sina (or Sawmill) Branch (lower 70 m) and Minnewauga Creek at their confluence at Ladd Springs/Sheeds Creek roads intersection, Polk Co., TN, 35.01°, -8468910°
Codoma Girard 1856 (1 sp.)
Codoma ornata*	SLUM CBD09-26.03	72CODOMAornata202474	Rio Mayo, Arroyo el Durango around 1.5 miles of Las Estrellas, Chihuahua, MX
Cyprinella Girard 1856 (30 spp.)
Cyprinella analostana	SLUM 1771	85CYPanalostana202506	Deep River at NC 22 (High Falls), 4.8 air miles NE Robbins, Moore Co., NC, 35.48°, -79.52020°
Cyprinella caerulea	SLUM 13330.01	88CYPcaerulea202507	Little River at AL Hwy 273 at Little River Community, Cherokee Co., AL,
Cyprinella callisema	SLUM 1797	91CYPcallisema202508	Middle Oconee River 0.2 miles above (N of) Mitchells Bridge Road, 3.3 air miles W center of Athens, Clarke Co., GA, 33.96°, -83.43970°
Cyprinella callistia	SLUM RLM5462	94CYPcallistia202509	Lightseys Mill Pond @ Hwy 219 ca 2mi S Centerville, Bibb Co., AL, 32.90976°, -87.12205°
Cyprinella camura	SLUM 333.01	01CYPcamura202510	Big Piney Cr @ Hwy 61 5mi SE Doloroso, Wilkinson Co., MS,
Cyprinella chloristia	SLUM 1802	05CYPchloristia202512	Lynches River at SC 265, 2.5 air miles WSW Jefferson, Chesterfield/Lancaster Co., SC, 34.63°, -80.42160°
Cyprinella galactura	SLUM RLM5936	14CYPgalactura202514	Little Chucky Creek @ Bible Branch Rd, Greene Co., TN, 36.12405°, -83.05238°
Cyprinella gibbsi	AUFT 5938	19CYPgibbsi202515	Pile Creek, upstream of Fuller Road, 3.1 miles SSW of Mellow Valley, Clay Co., AL, 33.1473°, -85.78384°
Cyprinella lutrensis*	SLUM RLM3451	15CYPlutrensis202527	Iroquois River @ CR 1700E, 4mi NE Crescent City, Iroquois Co., IL, 40.81157°, 87.807°
Cyprinella nivea	SLUM 1821	23CYPnivea202516	Little River at NC 24, 1.4 air miles N Spring Lake, Cumberland Co., NC, 35.19°, -78.9878°
Cyprinella pyrrhomelas	SLUM 1828	31CYPpyrrhomelas202518	Big Mountain Creek below confluence with Little Mountain Creek at Green Road (SR 1150), 4.4 air miles W Ellerbe, Richmond Co., NC, 35.09°, -79.83540°
Cyprinella trichroistia	AUFT 5933	43CYPtrichroistia202521	Cedar Creek, at CR 8, 0.79 km N of Fayetteville, Talladega Co, AL, 33.15255°, -86.40631°
Cyprinella venusta	AUFT 5922	39CYPvenusta202520	No locality available
Cyprinella whipplei	SLUM 211.02	35CYPwhipplei202519	Kiamichi R @ River Rd SW Muse, LeFlore Co., OK
Cyprinella xaenura	SLUM 1850	09CYPxaenura202513	Barber Creek above (W of) US 129/441, ca. 3.5 air miles SSW center of Athens, Clarke/Okonee Co., GA, 33.91°, -83.4049°
Ericymba Cope 1865 (2 spp., type = E. buccata)
Ericymba amplamala	AUFT 1085	10NOTROPamplamala202526	Bear Creek, at Ka-Po Plantation, at Silo Road, 2.1 miles NW of Comer, Barbour Co., AL, 32.05912°, -85.40291°
Ericymba amplamala	SLUM 675.04	02ERICbuccata202524	Tonacana Cr @ Lazy Acres Rd 4mi NNW Chuncky, Newton Co., MS
Graodus Günther 1868 (3 spp., type = G. boucardi)
Graodus moralesi	SELU 4688	66GRAODUSmoralesi202471	No locality available
Hudsonius Girard 1856 (3 spp.)
Hudsonius altipinnis	SLUM 1968	84HUDSONaltipinnis202491	Flat Creek at SR 99, about 9.0 air miles NE Kershaw, Lancaster Co., SC, 34.64°, -80.46460°
Hudsonius cummingsae	SLUM 2060	82HUDSONcummingsae202490	Mountain Creek at SR 1215 [Montrose Rd.], [ca. 9.7 air miles WNW center Raeford], Hoke Co., NC, 35.01°, -79.390556°
Hudsonius hudsonius*	SELU 917	80HUDSONhudsonius202488	Lake Superior at Wisconsin Point, Superior, Douglas Co., WI
Hybognathus Agassiz 1855 (7 spp., type = H. nuchalis)
Hybognathus hankinsoni	AUFT 6625	83HYBOGhankinsoni202502	Cormorant River, at Lanet Rd, 9.95 km N of Blackduck, Beltrami Co., MN, 47.8166°, -94.55408°
Hybopsis Agassiz 1854 (6 spp., type = H. gracilis)
Hybopsis hypsinotus	AUFT 1786	38HYBOPhypsinotus202559	Jackson Camp Creek, at Richland Road, 9.6 km SE of Blowing Rock, Caldwell Co., NC, 36.06972°, -81.59155°
Hybopsis lineapunctata	AUFT 5999	42HYBOPlineapunctata202560	Tributary of Emuckfaw Creek, upstream of Germany Ferry Road, 3 miles SW of Daviston, Tallpossa Co., AL, 33.02388°, -85.67811°
Hybopsis winchelli	AUFT 1077	48HYBOPwinchelli202562	Ihagee Creek, upstream of highway 165, 2.5 miles N of Holy Trinity, Russell Co., AL, 32.258,°, -84.99989°
Luxilus Rafinesque 1820 (9 spp.)
Luxilus albeolus	SLUM 1901	47LUXalbeolus202536	Rocky Branch ca. 50 ft. downstream of SR 1009, [ca. 0.9 air miles SW center Raleigh], Wake Co., NC, 35.77°, -78.64833°
Luxilus chrysocephalus*	AUFT 5962	06LUXchrycocephalus202525	Little Hillabee Creek, upstream of CR 148, 0.8 miles NW of Millerville, Clay Co., AL, 33.19804°, -85.93784°
Luxilus coccogenis	AUFT 1691	89LUXcoccogenis202504	Cullasaja River, upstream of Turtle Pond Road [SR1620], 5.35 km NW of Highlands, Macon Co. NC, 35.07654°, -83.24897°
Luxilus cornutus	AUFT 6122	20LUXcornutus202528	Tributary of Macon Creek, at intersection of Britton Rd and Pennington Rd, 7.3 km N of Britton, Lenawee Co., MI, 42.0526°, -83.83172°
Luxilus pilsbryi	SLUM RLM10208	24LUXpilsbryi202529	Buffalo River at Hasty; White River, Newton Co., AR, 35.9774°, -93.0435°
Luxilus zonatus	SLUM RLM4106	32LUXzonatus202531	Mill Creek @ Hwy 115 in Calamine, Sharp Co., AR, 36.012061° 91.39846°
Luxilus zonistius	AUFT 1140	28LUXzonistius202530	Foster Creek, upstream of highway 95, 4.75 miles N of Columbia, Henry Co., AL, 31.36097°, -85.11121°
Lythrurus Jordan 1876 (11 spp., type = L. umbratilis)
Lythrurus ardens	SLUM 1915	44LYTHardens202535	Aarons Creek at SR 1400 [Grassy Creek Virgilina Road], [ca. 2.1 air miles ESE Virgilina, VA], Granville Co., NC, 36.53°, -78.73925°
Lythrurus atrapiculus	AUFT 1079	36LYTHatrapiculus202532	Bear Creek, at Ka-Po Plantation, at Silo Road, 2.1 miles NW of Comer, Barbour Co., AL, 32.05912°, -85.40291°
Lythrurus bellus	AUFT 0647	40LYTHbellus202534	Old Town Creek [Line Creek], at Hwy 80, Montgomery Co., AL, 32.37289°, -86.00439°
Lythrurus fasciolaris	SLUM 1922	16LYTHfasciolaris202540	Dixon Creek at Dixon Springs Road, about 9.0 air miles NW Carthage, Smith Co., TN, 36.37°, -86.04890°
Lythrurus fumeus	SLUM 1928	11LYTHfumeus202539	Hatchie River at "The Big Eddy" at end of Big Eddy Road, off Hillville Loop Road, 11.0 air miles SE Brownsville, Haywood Co., TN, 35.47°, -89.13970°
Lythrurus lirus	SLUM 1930	07LYTHlirus202538	Sequatchie River, shoal area ca. 300 m above TN 111 (ca. river mile 49), 2.8 air miles NE center of Dunlap, Sequatchie Co., TN, 35.39° -85.35180°
Lythrurus roseipinnis	AUFT 0568	03LYTHroseipinnis202537	Randons Creek, at CR 1, 9 miles W of Frisco City, Monroe Co., AL, 31.43778°, -87.54476°
Miniellus Jordan 1888 (4 spp., type = M. procne)
Miniellus heterodon	SELU 991	34MINIheterodon202558	Trout River, W Trout Lake off Gresham Rd, Vilas Co., WI
Miniellus stramineus	AUFT 0061	30MINIstramineus202557	Johnson Creek, at SR 65, 6 miles S of Pawnee City, Pawnee Co, NE, 40.02544°, -96.16158°
Notropis Rafinesque 1818 (21 spp.)
Notropis amabilis	SLUM NAFF400	90NOTROPamabilis202493	San Felipe Springs at US Hwy 90 in Del Rio, Val Verde Co., TX,
Notropis amoenus	SLUM 2003	96NOTROPamoenus202496	Big Stonehouse Creek at Epworth Road (SR 1352), about 4.5 air miles NW Littleton, Warren Co., NC, 36.48°, -77.9680°
Notropis atherinoides*	SELU 1298	93NOTROP1298atherinoides202494	Lake Superior at Wisconsin Point, Superior, Douglas Co., WI
Notropis atherinoides*	SLUM 2018	95NOTROP2018atherinoides202495	Red River at US 82 (east bank), just E of Garland, Lafayette/Mille Co., AR, 33.36°, -93.70160°
Notropis buchanani	SLUM RLM3440	87NOTROPbuchanani202492	Iroquois River @ CR 1700E, 4mi NE Crescent City, Iroquois Co., IL, 40.81157°, 87.807°
Notropis jemezanus	UAIC 13508.03	79NOTROPjemezanus202449	Devils River at Devils River State Natural Area. 12 mi W of Loma Alta, Val Verde Co., TX, 29.89472°, -100.995°
Notropis micropteryx	SLUM 617.03	75NOTROPmicropteryx202497	East Fork Obey R @ TN Hwy 52, Fentress Co., TN
Notropis rubellus	SELU 1034	77NOTROPrubellus20249	Wisconsin R at Schofield Dam, Schofield, Marathon Co., WI
Notropis spectrunculus	AUFT 1693	81NOTROPspectrunculus202501	Cullasaja River, upstream of Turtle Pond Road [SR1620], 5.35 km NW of Highlands, Macon Co., NC, 35.07654°, -83.24897°
Notropis volucellus	SELU 218	46NOTROPvolucellus202523	Trout Lake at mouth Stevenson Creek, County rd M, Vilas Co., WI, 46.06138°, -89.6471°
Notropis wickliffi	SLUM 2308	92NOTROPwickliffi202505	Mississippi River, gravel/sand bar & overflow pond areas along upstream side of wing dam, off Coon Valley Road, Tripton Co., TN, 5.52°, -89.96480°
Incertae sedis
'Notropis' ammophilus	AUFT 0014	49QNOTROPammophilus202467	Randons Creek, at CR 1, 9 miles W of Frisco City, Monroe Co., AL, 31.43778°, -87.54476°
'Notropis' atrocaudalis	SLUM 2023	52QNOTROPatrocaudalis202500	Sulphur R., Red R., Atchafalaya Basin, Miller Co., AR
'Notropis' bifrenatus	SLUM 2027	51QNOTROPbifrenatus202489	Bachelor Creek near NC 43, 7.8 air miles WNW center New Bern, Craven Co., NC, 35.18°, -77.13190°
'Notropis' chihuahua	SLUM 5085	70QNOTROPchihuahua	Arroyo San Antonio Parral at intersection Hwy 45 and Hwy 35 to Nazas, Durango, MX
'Notropis' dorsalis	AUFT 0125	54QNOTROPdorsalis202522	Big Creek and tributary, at Boyer Ranch, 23 km W of Brownlee, Cherry Co., NE, 42.32339°, -100.88998°
'Notropis' greenei	SLUM RLM4330	56QNOTROPgreenei202544	S. Fork Little Red River @ confluence with Cedar Creek in Gulf Mountain WMA, Van Buren Co., AR, 35.55026°, -92.70385°
Notropis' heterolepis	SELU 1000	53QNOTROPheterolepis202511	Unnamed Tributary to Black River at Ball Park Rd, SE Whitteley, Taylor Co., WI, 45.2134°, -90.3328°
'Notropis' longirostris	AUFT 0048	86NOTROPlongirostris202503	Conecuh River, 2 miles S of Pollard, at Pollard Road, Escambia Co., AL, 31.00369°, -87.16467°
'Notropis' melanostomus	UAIC 12075.01	64QNOTROPmelanostomus202470	Backwater of Pascagoula River at MS Hwy 26, Geoirge Co., MS
'Notropis' nubilus	SLUM RLM10074	58QNOTROPnubilus202555	Spring River at Many Islands Park, Fulton Co., AR, 36.3876°, -91.5301°
'Notropis' sabinae	SLUM RLM6455	62QNOTROPsabinae202469	Sabine R @ US Hwy 59, ca. 7 mi S Marshall, Panola Co., TX, 32.32844°, -94.35448°
'Notropis' scabriceps	AUFT 1660	50QNOTROPscabriceps202478	North Fork New River and tributary, upstream of West Peak Road, 1 mile NNE of Sutherland, Ashe Co., NC, 36.4072°, -81.68091°
'Notropis' scepticus	SELU 153	60QNOTROPscepticus202468	Little River, Abbeville Co., SC
Opsopoeodus Hay 1881 (1 sp.)
Opsopoeodus emiliae*	AUFT 0638	45OPSOemiliae202561	Old Town Creek [Line Creek], at Hwy 80, Montgomery Co., AL, 32.37289°, -86.00439°
Pimephales Rafinesque 1820 (4 spp., type = P. promelas)
Pimephales vigilax	AUFT 6630	68QPIMEPHvigilax202472	Paint Rock River, along Butler Mill Rd., 5.47 km SW of Woodville, Madison/Marshall Co., AL, 34.5821°, -86.30605°
Pimephales vigilax	AUFT 5925	37PIMEPHvigilax202548	Uphapee Creek, at CR 53, 5.5 km ENE of Tuskegee; Tuskegee National Forest, Macon Co., AL, 32.451319°, -85.654519°
Pteronotropis Fowler 1935 (10 spp.)
Pteronotropis euryzonus	AUFT 1136	21PTEROeuryzonas202543	Foster Creek, upstream of highway 95, 4.75 miles N of Columbia, Henry Co., AL, 31.36097°, -85.11121°
Pteronotropis grandipinnis	AUFT 1123	17PTEROgrandipinnis202542	Bryans Creek, upstream of highway 95, 3.4 miles N of Lucy, Houston Co., AL, 31.06946°, -85.04491°
Pteronotropis harperi	AUFT 0585	41PTEROharperi202549	Cowarts Creek, upstream of Hwy 53, 1.5 km NW of Grangeburg, Houston Co., AL, 31.01692°, -85.22297°
Pteronotropis hubbsi	SLUM 4379	29PTEROhubbsi202546	Backwater ponds at Lazare Point in West Monroe, SE of I-20 Fifth Street exit, Ouachita, LA,
Pteronotropis hypselopterus*	SLUM RLM5732	25PTEROhypselopterus202545	Samson R @ CR 18 ca. 3mi W Hampton Beach, Bradford Co., FL, 29.86251°; -82.24106°
Pteronotropis merlini	AUFT 1855	12PTEROmerlini202541	Spring Creek, at Spring Creek Road, Geneva Co., AL, 31.03273°, -85.70049°
Pteronotropis signipinnis	AUFT 1861	33PTEROsignipinnis202547	Pond Creek, downstream of CR 24 crossing, 14.5 km SE of Carolina, Covington Co., AL, 31.10221°, -86.53954°

## Sheet: Sheet 1
Species	Tissue Voucher
Outgroup
Notemigonus crysoleucas	AUFT 6632
Chrosomus eos	AUFT 6624
Phoxinus phoxinus	SLUM B.91.T187
Semotilus atromaculatus	AUFT 5949
Ingroup
Alburnops Girard 1856 (20 spp.)
Alburnops baileyi	SELU 87
Alburnops blennius*	SELU 451
Alburnops chalybaeus	SLUM 2046
Alburnops chiliticus	AUFT 1726
Alburnops chlorocephalus	SLUM 2054
Alburnops chrosomus	SLUM 2056
Alburnops lutipinnis	SELU 492
Alburnops petersoni	SELU 945
Alburnops potteri	SLUM 2203
Alburnops rubricroceus	SLUM 2243
Alburnops shumardi	SLUM 2274
Alburnops texanus	AUFT 0579
Alburnops xaenocephalus	SLUM 2310
Codoma Girard 1856 (1 sp.)
Codoma ornata*	SLUM CBD09-26.03
Cyprinella Girard 1856 (30 spp.)
Cyprinella analostana	SLUM 1771
Cyprinella caerulea	SLUM 13330.01
Cyprinella callisema	SLUM 1797
Cyprinella callistia	SLUM RLM5462
Cyprinella camura	SLUM 333.01
Cyprinella chloristia	SLUM 1802
Cyprinella galactura	SLUM RLM5936
Cyprinella gibbsi	AUFT 5938
Cyprinella lutrensis*	SLUM RLM3451
Cyprinella nivea	SLUM 1821
Cyprinella pyrrhomelas	SLUM 1828
Cyprinella trichroistia	AUFT 5933
Cyprinella venusta	AUFT 5922
Cyprinella whipplei	SLUM 211.02
Cyprinella xaenura	SLUM 1850

## Sheet: Sheet 1-1
Species	Tissue Voucher
Ericymba Cope 1865 (2 spp., type = E. buccata)
Ericymba amplamala	AUFT 1085
Ericymba amplamala	SLUM 675.04
Erimystax Jordan 1882 (5 spp., type = E. dissimilis)
Erimystax insignis	AUFT 6631
Graodus Günther 1868 (3 spp., type = G. boucardi)
Graodus moralesi	SELU 4688
Hudsonius Girard 1856 (3 spp.)
Hudsonius altipinnis	SLUM 1968
Hudsonius cummingsae	SLUM 2060
Hudsonius hudsonius*	SELU 917
Hybognathus Agassiz 1855 (7 spp., type = H. nuchalis)
Hybognathus hankinsoni	AUFT 6625
Hybopsis hypsinotus	AUFT 1786
Hybopsis lineapunctata	AUFT 5999
Hybopsis winchelli	AUFT 1077
Luxilus Rafinesque 1820 (9 spp.)
Luxilus albeolus	SLUM 1901
Luxilus chrysocephalus*	AUFT 5962
Luxilus coccogenis	AUFT 1691
Luxilus cornutus	AUFT 6122
Luxilus pilsbryi	SLUM RLM10208
Luxilus zonatus	SLUM RLM4106
Luxilus zonistius	AUFT 1140
Lythrurus Jordan 1876 (11 spp., type = L. umbratilis)
Lythrurus ardens	SLUM 1915
Lythrurus atrapiculus	AUFT 1079
Lythrurus bellus	AUFT 0647
Lythrurus fasciolaris	SLUM 1922
Lythrurus fumeus	SLUM 1928
Lythrurus lirus	SLUM 1930
Lythrurus roseipinnis	AUFT 0568
Miniellus Jordan 1888 (4 spp., type = M. procne)
Miniellus heterodon	SELU 991
Miniellus stramineus	AUFT 0061

## Sheet: Sheet 1-1-1
Species	Tissue Voucher
Notropis Rafinesque 1818 (21 spp.)
Notropis amabilis	SLUM NAFF400
Notropis amoenus	SLUM 2003
Notropis atherinoides*	SELU 1298
Notropis atherinoides*	SLUM 2018
Notropis buchanani	SLUM RLM3440
Notropis jemezanus	UAIC 13508.03
Notropis micropteryx	SLUM 617.03
Notropis rubellus	SELU 1034
Notropis spectrunculus	AUFT 1693
Notropis volucellus	SELU 218
Notropis wickliffi	SLUM 2308
Incertae sedis
'Notropis' ammophilus	AUFT 0014
'Notropis' atrocaudalis	SLUM 2023
'Notropis' bifrenatus	SLUM 2027
'Notropis' chihuahua	SLUM 5085
'Notropis' dorsalis	AUFT 0125
'Notropis' greenei	SLUM RLM4330
'Notropis' heterolepis	SELU 1000
'Notropis' longirostris	AUFT 0048
'Notropis' melanostomus	UAIC 12075.01
'Notropis' nubilus	SLUM RLM10074
'Notropis' sabinae	SLUM RLM6455
'Notropis' scabriceps	AUFT 1660
'Notropis' scepticus	SELU 153
Opsopoeodus Hay 1881 (1 sp.)
Opsopoeodus emiliae*	AUFT 0638
Pimephales Rafinesque 1820 (4 spp., type = P. promelas)
Pimephales vigilax	AUFT 6630
Pimephales vigilax	AUFT 5925
Pteronotropis Fowler 1935 (10 spp.)
Pteronotropis euryzonas	AUFT 1136
Pteronotropis grandipinnis	AUFT 1123
Pteronotropis harperi	AUFT 0585
Pteronotropis hubbsi	SLUM 4379
Pteronotropis hypselopterus*	SLUM RLM5732
Pteronotropis merlini	AUFT 1855
Pteronotropis signipinnis	AUFT 1861
