# Supplementary material for: Phylogenomics and classification of Notropis and related shiners (Cypriniformes: Leuciscidae) and the utility of exon capture on lower taxonomic groups
Source: PeerJ. 2022 Oct 10;10:e14072. doi: 10.7717/peerj.14072 (PMC9558623; doi:10.7717/peerj.14072)
Supplement: Supplemental Information 2 — Notropis is limited to those species closely related to the type species, N. atherinoides, and is indicated in bold. Types of genera indicated by *. [file peerj-10-14072-s002.xls]

## Sheet: Sheet 1
	Current Taxonomy	Proposed Taxonomy	Common Name	Author	Examined Here
3	aguirrepequenoi, Notropis	Alburnops aguirrepequenoi	Soto la Marina Shiner	Contreras-Balderas & Rivera-Teillery, 1973
1	albeolus, Luxilus	Luxilus albeolus	White Shiner	(Jordan, 1889)	X
3	albizonatus, Notropis	Miniellus albizonatus	Palezone Shiner	Warren & Burr, 1994
3	alborus, Notropis	Miniellus alborus	Whitemouth Shiner	Hubbs & Raney, 1947
1	alegnotus, Lythrurus	Lythrurus alegnotus	Warrior Shiner	(Snelson, 1972)
4	alta, Yuriria	Yuriria alta*	Jalisco Chub	(Jordan, 1880)
2	altipinnis, Notropis	Hudsonius altipinnis	Highfin Shiner	(Cope, 1870)	X
1	alvarezdelvillari, Cyprinella	Cyprinella alvarezdelvillari	Tepehuan Shiner	Contreras-Balderas & Lozano-Vilano, 1994
2	amabilis, Notropis	Notropis amabilis	Texas Shiner	(Girard, 1856)	X
1	amarus, Hybognathus	Hybognathus amarus	Rio Grande Silvery Minnow	(Girard, 1856)
4	amatlana, Yuriria	Yuriria amatlana	Amatlan Chub	Domínguez-Domínguez, Pompa-Domínguez & Doadrio, 2007
1	amblops, Hybopsis	Hybopsis amblops*	Bigeye Chub	(Rafinesque, 1820)
3	amecae, Notropis	Aztecula amecae	Ameca Chub	Chernoff & Miller, 1986
3.2	ammophilus, Notropis	Miniellus ammophilus	Orangefin Shiner	Suttkus & Boschung, 1990	X
1	amnis, Hybopsis	Hybopsis amnis	Pallid Shiner	(Hubbs & Greene, 1951)
2	amoenus, Notropis	Notropis amoenus	Comely Shiner	(Abbott, 1874)	X
1	amplamala, Ericymba	Ericymba amplamala	Longjaw Minnow	(Pera & Armbruster, 2006)	X
1	analostana, Cyprinella	Cyprinella analostana	Satinfin Shiner	Girard, 1859	X
3	anogenus, Notropis	Miniellus anogenus	Pugnose Shiner	Forbes, 1885
1	aphanea, Algansea	Algansea aphanea	Riffle Chub	Barbour & Miller, 1978
1	ardens, Lythrurus	Lythrurus ardens	Rosefin Shiner	(Cope, 1868)	X
1	argyritis, Hybognathus	Hybognathus argyritis	Western Silvery Minnow	Girard, 1856
2	ariommus, Notropis	'Notropis' ariommus	Popeye Shiner	(Cope, 1867)
2	asperifrons, Notropis	Alburnops asperiforns	Burrhead Shiner	Suttkus & Raney, 1955
2	atherinoides, Notropis	Notropis atherinoides*	Emerald Shiner	Rafinesque, 1818	X
1	atrapiculus, Lythrurus	Lythrurus atrapiculus	Blacktip Shiner	(Snelson, 1972)	X
3.1	atrocaudalis, Notropis	‘Notropis’ atrocaudalis	Blackspot Shiner	Evermann, 1892	X
3	aulidion, Notropis	Aztecula aulidion	Durango Shiner	Chernoff & Miller, 1986
1	avia, Algansea	Algansea avia	Remote Chub	Barbour & Miller, 1978
2	baileyi, Notropis	Alburnops baileyi	Rough Shiner	Suttkus & Raney, 1955	X
2	bairdi, Notropis	Alburnops bairdi	Red River Shiner	Hubbs & Ortenburger, 1929
1	barbata, Algansea	Algansea barbata	Lerma Chub	Álvarez & Cortés, 1964
1	bellus, Lythrurus	Lythrurus bellus	Pretty Shiner	(Hay, 1881)	X
3.1	bifrenatus, Notropis	‘Notropis’ bifrenatus	Bridle Shiner	(Cope, 1867)	X
2	blennius, Notropis	Alburnops blennius*	River Shiner	(Girard, 1856)	X
1	bocagrande, Cyprinella	Cyprinella bocagrande	Largemouth Shiner	(Chernoff & Miller, 1982)
3	boops, Notropis	Miniellus boops	Bigeye Shiner	Gilbert, 1884
2	boucardi, Notropis	Graodus boucardi*	Balsas Shiner	(Günther, 1868)
3	braytoni, Notropis	Alburnops braytoni	Tamaulipas Shiner	Jordan & Evermann, 1896
1	buccata, Ericymba	Ericymba buccata*	Silverjaw Minnow	Cope, 1865
2	buccula, Notropis	Alburnops buccula	Smalleye Shiner	Cross, 1953
2.25	buchanani, Notropis	Paranotropis buchanani	Ghost Shiner	Meek, 1896	X
1	caerulea, Cyprinella	Cyprinella caerulea	Blue Shiner	(Jordan, 1877)	X
2	cahabae, Notropis	Paranotropis cahabae	Cahaba Shiner	Mayden & Kuhajda, 1989
3.5	calabazas, Notropis	Aztecula calabazas	Calabazas Shiner	Lyons & Mercado-Silva, 2004
2	calientis, Notropis	Aztecula calientis	Yellow Shiner	Jordan & Snyder, 1899
1	callisema, Cyprinella	Cyprinella callisema	Ocmulgee Shiner	(Jordan, 1877)	X
1.5	callistia, Cyprinella	‘Cyprinella’ callistia	Alabama Shiner	(Jordan, 1877)	X
1	callitaenia, Cyprinella	Cyprinella callitaenia	Bluestripe Shiner	(Bailey & Gibbs, 1956)
1	camura, Cyprinella	Cyprinella camura	Bluntface Shiner	(Jordan & Meek, 1884)	X
2	candidus, Notropis	Alburnops candidus	Silverside Shiner	Suttkus, 1980
1	cardinalis, Luxilus	Luxilus cardinalis	Cardinal Shiner	(Mayden, 1988)
4	catostomops, Tampichthys	Tampichthys catostomops	Pánuco Minnow	(Hubbs & Miller, 1977)
1	cerasinus, Luxilus	Luxilus cerasinus	Crescent Shiner	(Cope, 1868)
2	chalybaeus, Notropis	Alburnops chalybaeus	Ironcolor Shiner	(Cope, 1867)	X
4	chapalae, Yuriria	Yuriria chapalae	Chapala Chub	(Jordan & Snyder, 1899)
3.2	chihuahua, Notropis	Miniellus chihuahua	Chihuahua Shiner	Woolman, 1892	X
2.1	chiliticus, Notropis	Hydrophlox chiliticus	Redlip Shiner	(Cope, 1870)	X
1	chloristia, Cyprinella	Cyprinella chloristia	Greenfin Shiner	(Jordan & Brayton, 1878)	X
2.1	chlorocephalus, Notropis	Hydrophlox chlorocephalus	Greenhead Shiner	(Cope, 1870)	X
2.1	chrosomus, Notropis	Hydrophlox chrosomus	Rainbow Shiner	(Jordan, 1877)	X
1	chrysocephalus, Luxilus	Luxilus chrysocephalus*	Striped Shiner	Rafinesque, 1820	X
1	chrysogaster, Agosia	Agosia chrysogaster*	Longfin Dace	Girard, 1856
1.6	coccogenis, Luxilus	Coccotis coccogenis*	Warpaint Shiner	(Cope, 1868)	X
1	cornutus, Luxilus	Luxilus cornutus	Common Shiner	(Mitchill, 1817)	X
2	cumingii, Notropis	Graodus cumingii	Atoyac Chub	(Günther, 1868)
2.9	cummingsae, Notropis	Pteronotropis cummingsae	Dusky Shiner	Myers, 1925	X
4	dichromus, Tampichthys	Tampichthys dichromus	Bicolor Minnow	(Hubbs & Miller, 1977)
3	dorsalis, Notropis	Ericymba dorsalis	Bigmouth Shiner	(Agassiz, 1854)	X
2	edwardraneyi, Notropis	Alburnops edwardraneyi	Fluvial Shiner	Suttkus & Clemmer, 1968
4	emiliae, Opsopoeodus	Opsopoeodus emiliae*	Pugnose Minnow	Hay, 1881	X
4	erimyzonops, Tampichthys	Tampichthys erimyzonops	Chubsucker Minnow	(Hubbs & Miller, 1974)
1	eurystoma, Cyprinella	Cyprinella eurystoma		(Jordan, 1877)
4	euryzonus, Pteronotropis	Pteronotropis euryzonus	Broadstripe Shiner	(Suttkus, 1955)	X
1	fasciolaris, Lythrurus	Lythrurus fasciolaris	Scarlet Shiner	(Gilbert, 1891)	X
1	formosa, Cyprinella	Cyprinella formosa	Beautiful Shiner	(Girard, 1856)
1	fumeus, Lythrurus	Lythrurus fumeus	Ribbon Shiner	(Evermann, 1892)	X
1	galactura, Cyprinella	Cyprinella galactura	Whitetail Shiner	(Cope, 1868)	X
1	garmani, Cyprinella	Cyprinella garmani	Gibbous Shiner	(Jordan, 1885)
1	gibbsi, Cyprinella	Cyprinella gibbsi	Tallapoosa Shiner	(Howell & Williams, 1971)	X
2	girardi, Notropis	Alburnops girardi	Arkansas River Shiner	Hubbs & Ortenburger, 1929
4	grandipinnis, Pteronotropis	Pteronotropis grandipinnis	Apalachee Shiner	(Jordan, 1877)	X
3.5	grandis, Notropis	Aztecula grandis	Zacapu Shiner	Domínguez-Domínguez, Pérez-Rodríguez, Escalera-Vázquez & Doadrio, 2009
3.2	greenei, Notropis	Miniellus greenei	Wedgespot Shiner	Hubbs & Ortenburger, 1929	X
1	hankinsoni, Hybognathus	Hybognathus hankinsoni	Brassy Minnow	Hubbs, 1929	X
4	harperi, Pteronotropis	Pteronotropis harperi	Redeye Chub	(Fowler, 1941)	X
1	hayi, Hybognathus	Hybognathus hayi	Cypress Minnow	Jordan, 1885
2	heterodon, Notropis	Miniellus heterodon	Blackchin Shiner	(Cope, 1865)	X
3.1	heterolepis, Notropis	‘Notropis’ heterolepis	Blacknose Shiner	Eigenmann & Eigenmann, 1893	X
4	hubbsi, Pteronotropis	Pteronotropis hubbsi	Bluehead Shiner	(Bailey & Robison, 1978)	X
2	hudsonius, Notropis	Hudsonius hudsonius*	Spottail Shiner	(Clinton, 1824)	X
4	hypselopterus, Pteronotropis	Pteronotropis hypselopterus*	Sailfin Shiner	(Günther, 1868)	X
2	hypsilepis, Notropis	Alburnops hypsilepis	Highscale Shiner	Suttkus & Raney, 1955
1	hypsinotus, Hybopsis	Hybopsis hypsinotus	Highback Chub	(Cope, 1870)	X
3.5	imeldae, Notropis	Graodus cumingii	Atoyac Chub	(Cortés, 1968)
4	ipni, Tampichthys	Tampichthys ipni	Lantern Minnow	(Álvarez & Navarro, 1953)
2	jemezanus, Notropis	Notropis jemezanus	Rio Grande Shiner	(Cope, 1875)	X
1	labrosa, Cyprinella	Cyprinella labrosa	Thicklip Chub	(Cope, 1870)
1	lacustris, Algansea	Algansea lacustris	Pátzcuaro Chub	Steindachner, 1895
1	leedsi, Cyprinella	Cyprinella leedsi	Bannerfin Shiner	(Fowler, 1942)
1	lepida, Cyprinella	Cyprinella lepida	Plateau Shiner	Girard, 1856
2.2	leuciodus, Notropis	Paranotropis leuciodus*	Tennessee Shiner	(Cope, 1868)
1	lineapunctata, Hybopsis	Hybopsis lineapunctata	Lined Chub	Clemmer & Suttkus, 1971	X
1	lirus, Lythrurus	Lythrurus lirus	Mountain Shiner	(Jordan, 1877)	X
3.2	longirostris, Notropis	Miniellus longirostris	Longnose Shiner	(Hay, 1881)	X
2.1	lutipinnis, Notropis	Hydrophlox lutipinnis	Yellowfin Shiner	(Jordan & Brayton, 1878)	X
1	lutrensis, Cyprinella	Cyprinella lutrensis*	Red Shiner	(Baird & Girard, 1853)	X
3	maculatus, Notropis	‘Notropis’ maculatus	Taillight Shiner	(Hay, 1881)
4	mandibularis, Tampichthys	Tampichthys mandibularis	Flatjaw Minnow	(Contreras-Balderas & Verduzco-Martínez, 1977)
3.5	marhabatiensis, Notropis	Aztecula marhabatiensis	Maravatío Shiner	Domínguez-Domínguez, Pérez-Rodríguez, Escalera-Vázquez & Doadrio, 2009
1	matutinus, Lythrurus	Lythrurus matutinus	Pinewoods Shiner	(Cope, 1870)
3	mekistocholas, Notropis	Miniellus mekistocholas	Cape Fear Shiner	Snelson, 1971
3.2	melanostomus, Notropis	Miniellus melanostomus	Blackmouth Shiner	Bortone, 1989	X
4	merlini, Pteronotropis	Pteronotropis merlini	Orangetail Shiner	(Suttkus & Mettee, 2001)	X
4	metallicus, Pteronotropis	Pteronotropis metallicus	Metallic Shiner	(Jordan & Meek, 1884)
2	micropteryx, Notropis	Notropis micropteryx	Highland Shiner	(Cope, 1868)	X
1	monachus, Erimonax	Erimonax monachus*	Spotfin Chub	(Cope, 1868)
1	monticola, Algansea	Algansea monticola	Mountain Chub	Barbour & Contreras-Balderas, 1968
2	moralesi, Notropis	Graodus moralesi	Papaloapan Chub	De Buen, 1955	X
3	nazas, Notropis	Hybognathus' nazas	Nazas Shiner	Meek, 1904
1	nivea, Cyprinella	Cyprinella nivea	Whitefin Shiner	(Cope, 1870)	X
4	notatus, Pimephales	Pimephales notatus	Bluntnose Minnow	(Rafinesque, 1820)
3.2	nubilus, Notropis	Miniellus nubilus	Ozark Minnow	(Forbes, 1878)	X
1	nuchalis, Hybognathus	Hybognathus nuchalis*	Mississippi Silvery Minnow	Agassiz, 1855
3	orca, Notropis	Alburnops orca	Phantom Shiner	Woolman, 1894
1	ornata, Codoma	Codoma ornata*	Ornate Shiner	Girard, 1856	X
3	ortenburgeri, Notropis	Miniellus ortenburgeri	Kiamichi Shiner	Hubbs, 1927
2	oxyrhynchus, Notropis	Notropis oxyrhynchus	Sharpnose Shiner	Hubbs & Bonham, 1951
2	ozarcanus, Notropis	Paranotropis ozarcanus	Ozark Shiner	Meek, 1891
1	panarcys, Cyprinella	Cyprinella panarcys	Conchos Shiner	(Hubbs & Miller, 1978)
2	percobromus, Notropis	Notropis percobromus	Carmine Shiner	(Cope, 1871)
2	perpallidus, Notropis	Miniellus perpallidus	Peppered Shiner	Hubbs & Black, 1940
2	petersoni, Notropis	Alburnops petersoni	Coastal Shiner	Fowler, 1942	X
3	photogenis, Notropis	Notropis photogenis	Silver Shiner	(Cope, 1865)
1	pilsbryi, Luxilus	Luxilus pilsbryi	Duskystripe Shiner	(Fowler, 1904)	X
1	placitus, Hybognathus	Hybognathus placitus	Plains Minnow	Girard, 1856
1	popoche, Algansea	Algansea popoche	Popoche Chub	(Jordan & Snyder, 1899)
2	potteri, Notropis	Alburnops potteri	Chub Shiner	Hubbs & Bonham, 1951	X
2	procne, Notropis	Miniellus procne*	Swallowtail Shiner	(Cope, 1865)
4	promelas, Pimephales	Pimephales promelas*	Fathead Minnow	Rafinesque, 1820
1	proserpina, Cyprinella	Cyprinella proserpina	Proserpine Shiner	(Girard, 1856)
1	pyrrhomelas, Cyprinella	Cyprinella pyrrhomelas	Fieryblack Shiner	(Cope, 1870)	X
3	rafinesquei, Notropis	Miniellus rafinesquei	Yazoo Shiner	Suttkus, 1991
4	rasconis, Tampichthys	Tampichthys rasconis*	Blackstripe Minnow	(Jordan & Snyder, 1899)
1	regius, Hybognathus	Hybognathus regius	Eastern Silvery Minnow	Girard, 1856
1	roseipinnis, Lythrurus	Lythrurus roseipinnis	Cherryfin Shiner	(Hay, 1885)	X
2	rubellus, Notropis	Notropis rubellus	Rosyface Shiner	(Agassiz, 1850)	X
2.1	rubricroceus, Notropis	Hydrophlox rubricroceus*	Saffron Shiner	(Cope, 1868)	X
1	rubrifrons, Hybopsis	Hybopsis rubrifrons	Rosyface Chub	(Jordan, 1877)
3	rupestris, Notropis	‘Notropis’ rupestris	Bedrock Shiner	Page, 1987
1	rutila, Cyprinella	Cyprinella rutila	Mexican red Shiner	(Girard, 1856)
3.2	sabinae, Notropis	Miniellus sabinae	Sabine Shiner	Jordan & Gilbert, 1886	X
3	saladonis, Notropis	‘Notropis’ saladonis	Salado Shiner	Hubbs & Hubbs, 1958
1	sallaei, Aztecula	Aztecula sallaei*	Aztec Chub	(Günther, 1868[9]
3.2	scabriceps, Notropis	Miniellus scabriceps	New River Shiner	(Cope, 1868)	X
3	scepticus, Notropis	‘Notropis’ scepticus	Sandbar Shiner	(Jordan & Gilbert, 1883)	X
3	semperasper, Notropis	Notropis semperasper	Roughhead Shiner	Gilbert, 1961
2.25	shumardi, Notropis	Paranotropis shumardi	Silverband Shiner	Girard, 1856
4	signipinnis, Pteronotropis	Pteronotropis signipinnis	Flagfin Shiner	(Bailey & Suttkus, 1952)	X
3	simus, Notropis	Alburnops simus	Bluntnose Shiner	(Cope, 1875)
1	snelsoni, Lythrurus	Lythrurus snelsoni	Ouachita Shiner	(Robison, 1985)
2.25	spectrunculus, Notropis	Paranotropis spectrunculus	Mirror Shiner	(Cope, 1868)	X
1	spiloptera, Cyprinella	Cyprinella spiloptera	Spotfin Shiner	(Cope, 1867)
1	stigmatura, Cyprinella	Cyprinella stigmatura		(Jordan, 1877)
2	stilbius, Notropis	Notropis stilbius	Silverstripe Shiner	Jordan, 1877
4	stonei, Pteronotropis	Pteronotropis stonei	Lowland Shiner	(Fowler, 1921)
2	stramineus, Notropis	Miniellus stramineus	Sand Shiner	(Cope, 1865)	X
2	suttkusi, Notropis	Notropis suttkusi	Rocky Shiner	Humphries & Cashner, 1994
3	telescopus, Notropis	'Notropis' telescopus	Telescope Shiner	(Cope, 1868)
4	tenellus, Pimephales	Pimephales tenellus	Slim Minnow	(Girard, 1856)
2	texanus, Notropis	Alburnops texanus	Weed Shiner	(Girard, 1856)	X
1	tincella, Algansea	Algansea tincella*	Spottail Chub	(Valenciennes, 1844)
2	topeka, Notropis	Miniellus topeka	Topeka Shiner	(Gilbert, 1884)
1	trichroistia, Cyprinella	Cyprinella trichroistia	Tricolor Shiner	(Jordan & Gilbert, 1878)	X
3	tropicus, Notropis	‘Notropis’ tropicus	Pygmy Shiner	Hubbs & Miller, 1975
1	umbratilis, Lythrurus	Lythrurus umbratilis*	Redfin Shiner	(Girard, 1856)
3	uranoscopus, Notropis	Miniellus uranoscopus	Skygazer Shiner	Suttkus, 1959
1	venusta, Cyprinella	Cyprinella venusta	Blacktail Shiner	Girard, 1856	X
4	vigilax, Pimephales	Pimephales vigilax	Bullhead Minnow	(Baird & Girard, 1853)	X
2.25	volucellus, Notropis	Paranotropis volucellus	Mimic Shiner	(Cope, 1865)	X
4	welaka, Pteronotropis	Pteronotropis welaka	Bluenose Shiner	(Evermann & Kendall, 1898)
1	whipplei, Cyprinella	Cyprinella whipplei	Steelcolor Shiner	Girard, 1856	X
2.25	wickliffi, Notropis	Paranotropis wickliffi	Channel Shiner	Trautman, 1931	X
1	winchelli, Hybopsis	Hybopsis winchelli	Clear Chub	Girard, 1856	X
2	xaenocephalus, Notropis	Alburnops xaenocephalus	Coosa Shiner	(Jordan, 1877)	X
1	xaenura, Cyprinella	Cyprinella xaenura	Altamaha Shiner	(Jordan, 1877)	X
1	xanthicara, Cyprinella	Cyprinella xanthicara	Cuatro Cienegas Shiner	(Minckley & Lytle, 1969)
1	zanema, Cyprinella	Cyprinella zanema	Santee Chub	(Jordan & Brayton, 1878)
1	zonatus, Luxilus	Luxilus zonatus	Bleeding Shiner	(Putnam, 1863)	X
1.6	zonistius, Luxilus	Coccotis zonistius	Bandfin Shiner	Jordan, 1880	X
